# Supplementary material for: Cl- and Al-Doped Argyrodite Solid Electrolyte Li6PS5Cl for All-Solid-State Lithium Batteries with Improved Ionic Conductivity
Source: MDPI journal article supplement (doi:10.3390/nano12244355), 2022-12-07
Supplement: s1 [file s1]

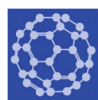

## Supplementary Information

# Cl- and Al-Doped Argyrodite Solid Electrolyte $\text{Li}_6\text{PS}_5\text{Cl}$ for All-Solid-State Lithium Batteries with Improved Ionic Conductivity

Yeong Jun Choi <sup>1,2</sup>, Sun-I Kim <sup>1</sup>, Mingyu Son <sup>1,2</sup>, Jung Woo Lee <sup>2,\*</sup> and Duck Hyun Lee <sup>1,3,\*</sup>

<sup>1</sup> Green Materials and Processes R&D Group, Korea Institute of Industrial Technology, Ulsan 44413, Republic of Korea; yjchoi@kitech.re.kr (Y.J.C.); sunikim@kitech.re.kr (S.-I.K.); smg0616@kitech.re.kr (M.S.)

<sup>2</sup> Department of Materials Science and Engineering, Pusan National University, Busan 46241, Republic of Korea

<sup>3</sup> School of Materials Science and Engineering, Andong National University, Andong 36729, Republic of Korea

\* Correspondence: jungwoolee@pusan.ac.kr (J.W.L.); dulee@kitech.re.kr (D.H.L.)

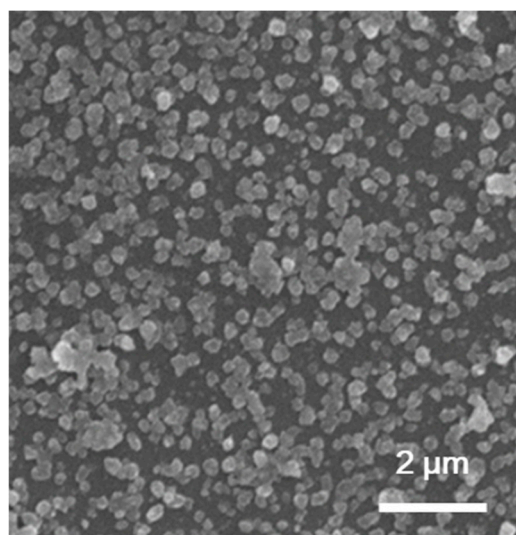

Figure S1. FE-SEM images of  $\text{Li}_{5.4}\text{Al}_{0.1}\text{PS}_{4.7}\text{Cl}_{1.3}$  electrolytes.

**Citation:** Choi, Y.J.; Kim, S.-I.; Son, M.; Lee, J.W.; Lee, D.H. Cl- and Al-Doped Argyrodite Solid Electrolyte  $\text{Li}_6\text{PS}_5\text{Cl}$  for All-Solid-State Lithium Batteries with Improved Ionic Conductivity. *Nanomaterials* **2022**, *12*, x. <https://doi.org/10.3390/xxxxx>

Academic Editors: Dawei Su, Jun Liu

Received: 19 September 2022

Accepted: 5 December 2022

Published: 7 December 2022

**Publisher's Note:** MDPI stays neutral with regard to jurisdictional claims in published maps and institutional affiliations.

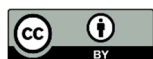

**Copyright:** © 2022 by the authors. Licensee MDPI, Basel, Switzerland. This article is an open access article distributed under the terms and conditions of the Creative Commons Attribution (CC BY) license (<https://creativecommons.org/licenses/by/4.0/>).

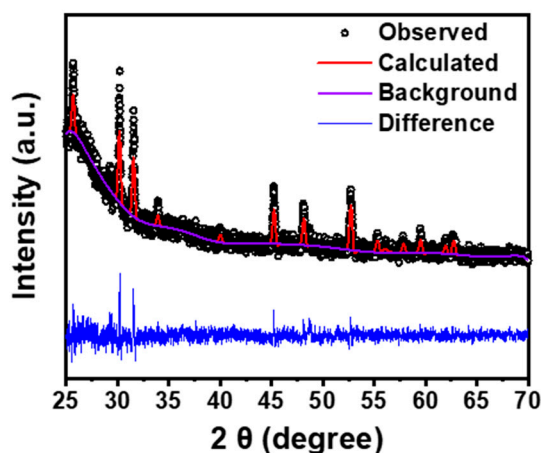

Figure S2. XRD pattern of and the corresponding Rietveld refinement of  $\text{Li}_{5.4}\text{Al}_{0.1}\text{PS}_{4.7}\text{Cl}_{1.3}$  electrolyte.

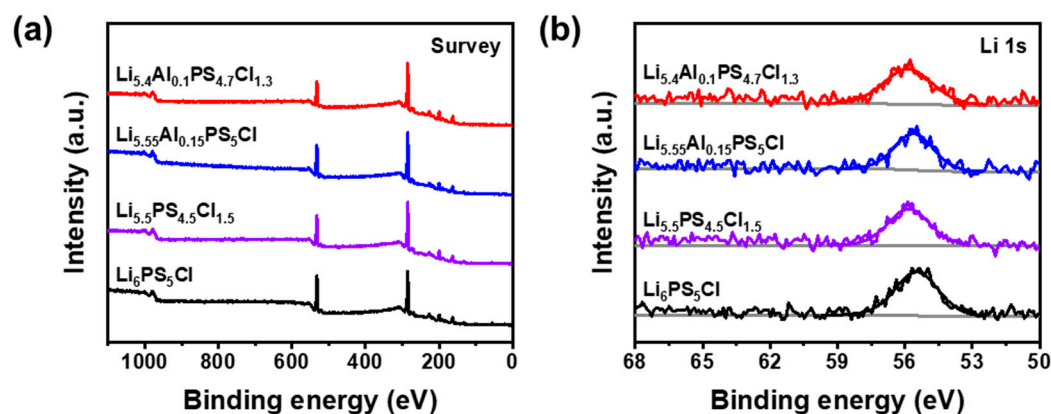

**Figure S3.** XPS spectra of  $\text{Li}_6\text{PS}_5\text{Cl}$ ,  $\text{Li}_{5.5}\text{PS}_{4.5}\text{Cl}_{1.5}$ ,  $\text{Li}_{5.55}\text{Al}_{0.15}\text{PS}_5\text{Cl}$ , and  $\text{Li}_{5.4}\text{Al}_{0.1}\text{PS}_{4.7}\text{Cl}_{1.3}$  electrolytes for (a) Survey, and (b) Li 1s.

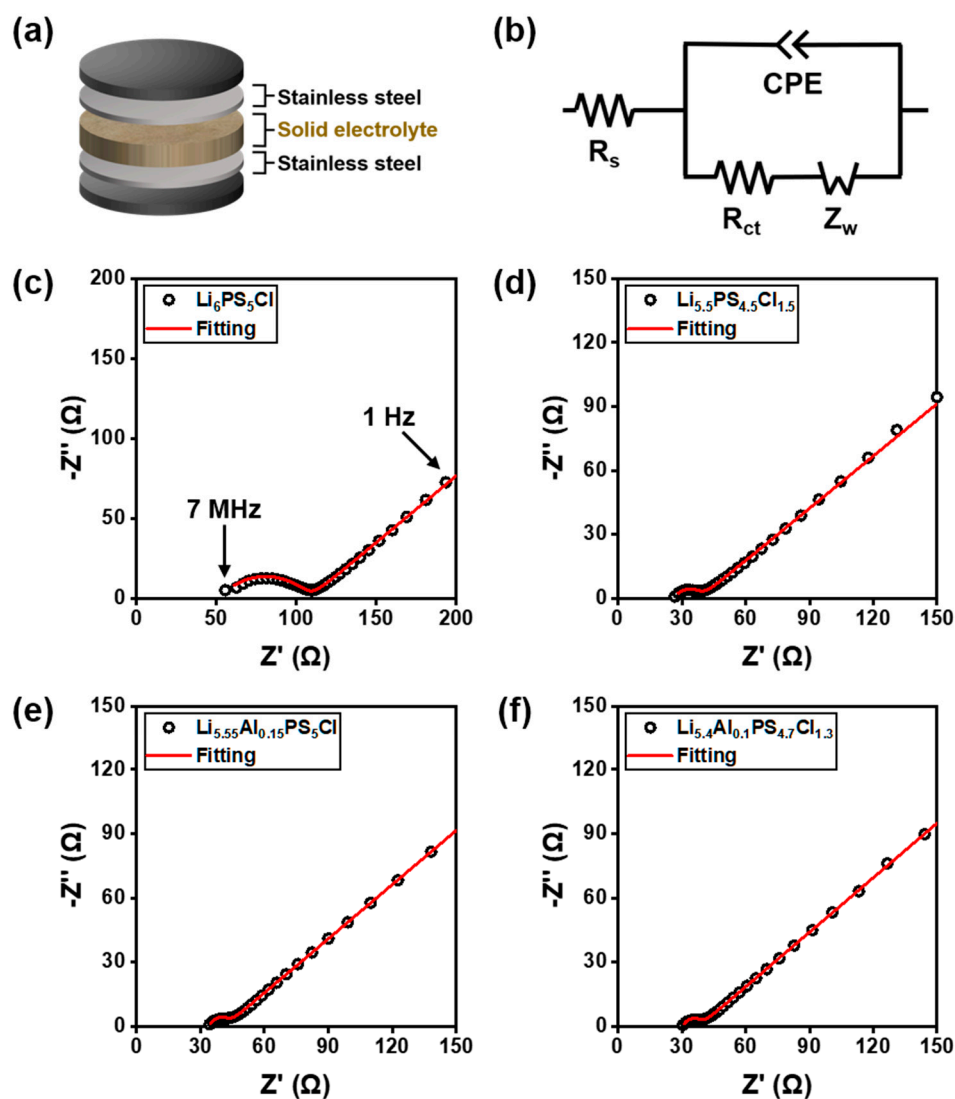

**Figure S4.** (a) Schematic diagram of cell geometry for impedance measurement. (b) Equivalent circuit for modeling the EIS data. Nyquist plots of (c)  $\text{Li}_6\text{PS}_5\text{Cl}$ , (d)  $\text{Li}_{5.5}\text{PS}_{4.5}\text{Cl}_{1.5}$ , (e)  $\text{Li}_{5.55}\text{Al}_{0.15}\text{PS}_5\text{Cl}$ , and (f)  $\text{Li}_{5.4}\text{Al}_{0.1}\text{PS}_{4.7}\text{Cl}_{1.3}$  electrolytes, respectively. Experimental data (circles) was fitted with the simulated data from equivalent circuit modeling (lines).

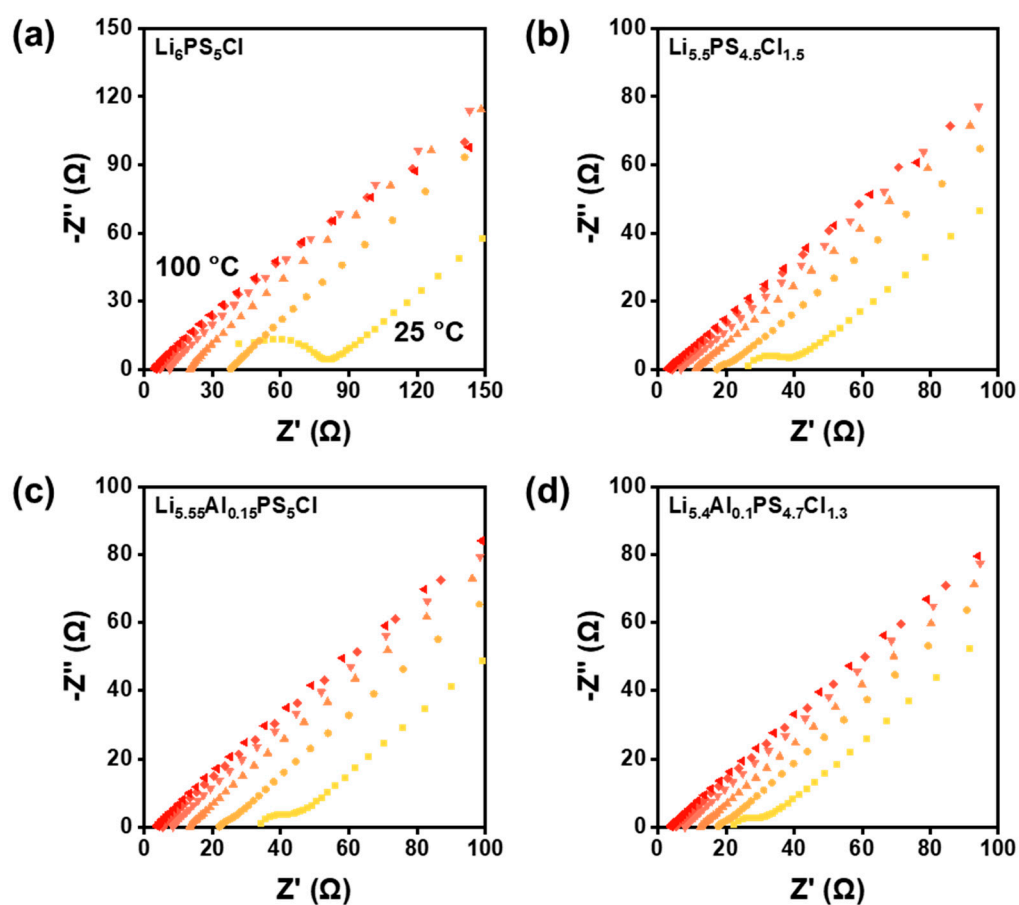

**Figure S5.** Nyquist plots of the (a)  $\text{Li}_6\text{PS}_5\text{Cl}$ , (b)  $\text{Li}_{5.5}\text{PS}_{4.5}\text{Cl}_{1.5}$ , (c)  $\text{Li}_{5.55}\text{Al}_{0.15}\text{PS}_5\text{Cl}$ , and (d)  $\text{Li}_{5.4}\text{Al}_{0.1}\text{PS}_{4.7}\text{Cl}_{1.3}$  electrolytes measured from 25 to 100 °C, respectively.

**Table S1.** Rietveld refinements data of  $\text{Li}_{5.4}\text{Al}_{0.1}\text{PS}_{4.7}\text{Cl}_{1.3}$  electrolyte.

| space group $F\bar{4}3m$ , $a=10.28 \text{ \AA}$ , $R_{wp}=19.51 \%$ |      |         |         |         |      |                         |
|----------------------------------------------------------------------|------|---------|---------|---------|------|-------------------------|
| atom                                                                 | site | x       | y       | z       | OCC. | Uiso ( $\text{\AA}^2$ ) |
| Li1                                                                  | 24g  | 0.25    | 0.25    | 0.36369 | 1    | -2.62899                |
| P1                                                                   | 4b   | 0.5     | 0       | 0       | 1    | 0.05134                 |
| S1                                                                   | 4a   | 0.25    | 0.25    | 0.25    | 1    | -1.02402                |
| S2                                                                   | 4c   | 0.12684 | 0.37316 | 0.87316 | 1    | -0.05982                |
| Cl1                                                                  | 4a   | 0       | 0       | 0       | 1    | -0.11452                |
